# Supplementary material
Source: publisher figshare collection journal article supplement (https://acs.figshare.com/ndownloader/files/5700942)
Supplement: Supplementary file 1 [file 5700942]

## Supporting Information

### Kinetics and Mechanism of Oxygen Atom Transfer from Methyl Phenyl Sulfoxide to Triarylphosphines Catalyzed by an Oxorhenium(V) Dimer

Nobuyoshi Koshino and James H. Espenson\*

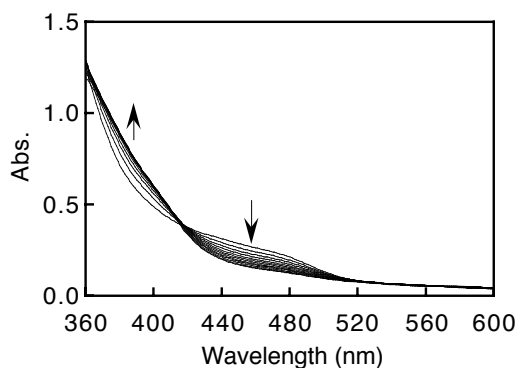

**Figure S1.** UV/Vis spectral changes accompanying the formation of **D**–**L** (**L** = methyl phenyl sulfoxide).

Arrows indicate the direction of the absorbance change.

$[\{\text{MeReO}(\text{mtp})\}_2] = 0.49 \text{ mmol L}^{-1}$  and  $[\text{MeS}(\text{O})\text{Ph}]_{\text{T}} = 0.244 \text{ M}$  in benzene at  $23.0^\circ\text{C}$ .

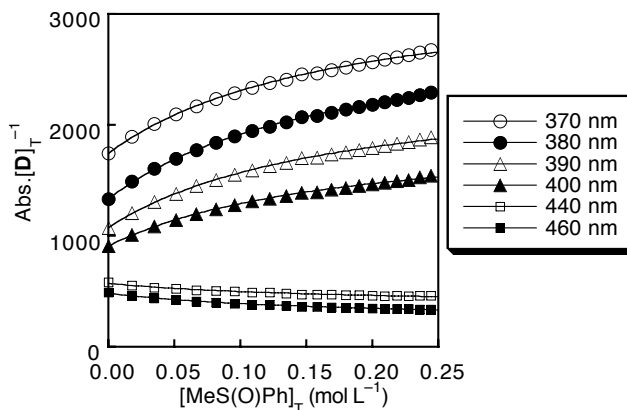

**Figure S2.** Plots of absorbance at selected wavelengths against the total concentrations of  $\text{MeS}(\text{O})\text{Ph}$ .

The solid lines represent the best fit based on the **D** + **L** = **D**–**L** model.

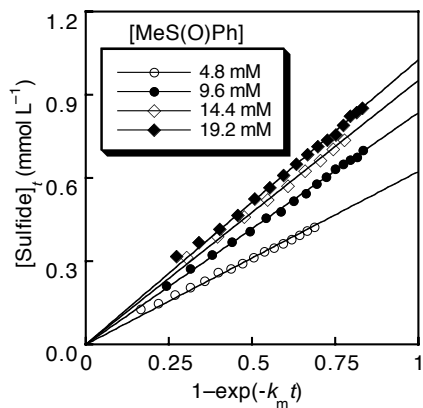

**Figure S3.** Plots of  $[\text{Sulfide}]_t$  against  $\{1 - \exp(-k_m t)\}$  at different concentrations of  $\text{MeS}(\text{O})\text{Ph}$ .

$[\{\text{MeReO}(\text{mtp})\}_2] = 0.49 \text{ mM}$  and  $[\text{PPh}_3] = 21.7 \text{ mM}$  in  $\text{C}_6\text{D}_6$  at  $23^\circ\text{C}$ .

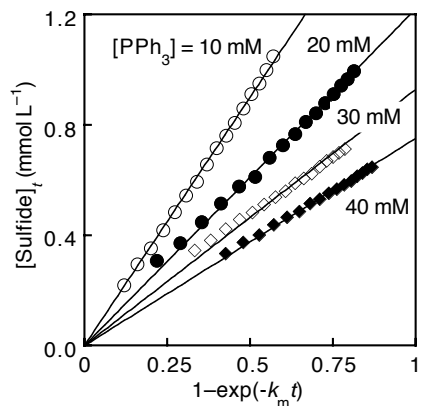

**Figure S4.** Plots of  $[\text{Sulfide}]_t$  against  $\{1 - \exp(-k_m t)\}$  at different concentrations of  $\text{PPh}_3$ .  $[\{\text{MeReO}(\text{mtp})\}_2] = 0.49 \text{ mM}$  and  $[\text{MeS}(\text{O})\text{Ph}] = 9.9 \text{ mM}$  in  $\text{C}_6\text{D}_6$  at  $23^\circ\text{C}$ .

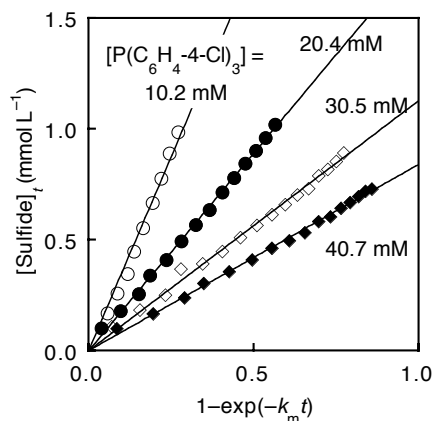

**Figure S5.** Plots of  $[\text{Sulfide}]_t$  against  $\{1 - \exp(-k_m t)\}$  at different concentrations of  $\text{P}(\text{C}_6\text{H}_4\text{-4-Cl})_3$ .  $[\{\text{MeReO}(\text{mtp})\}_2] = 0.50 \text{ mM}$  and  $[\text{MeS}(\text{O})\text{Ph}] = 10.2 \text{ mM}$  in  $\text{C}_6\text{D}_6$  at  $23^\circ\text{C}$ .

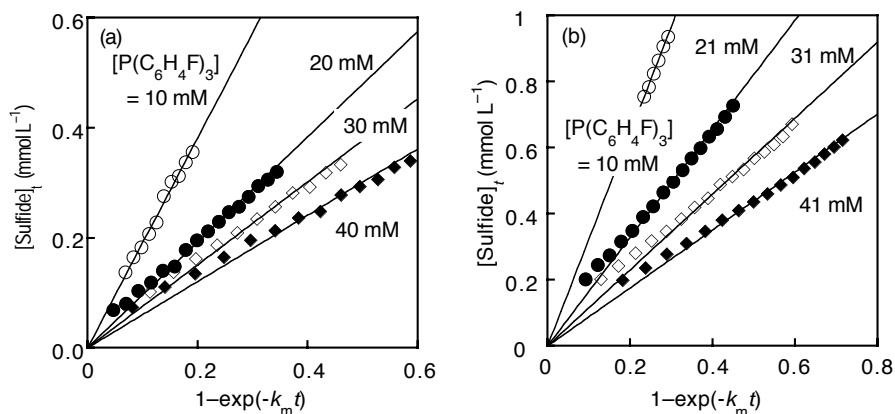

**Figure S6.** Plots of  $[\text{Sulfide}]_t$  against  $\{1 - \exp(-k_m t)\}$  at different concentrations of  $\text{P}(\text{C}_6\text{H}_4\text{-4-F})_3$  for the oxygen atom transfer reaction from  $\text{MeS}(\text{O})\text{Ph}$  to  $\text{P}(\text{C}_6\text{H}_4\text{-4-F})_3$ . (a)  $[\{\text{MeReO}(\text{mtp})\}_2] = 0.83 \text{ mM}$  and  $[\text{MeS}(\text{O})\text{Ph}] = 3.6 \text{ mM}$ , (b)  $[\{\text{MeReO}(\text{mtp})\}_2] = 0.76 \text{ mM}$  and  $[\text{MeS}(\text{O})\text{Ph}] = 9.4 \text{ mM}$  in  $\text{C}_6\text{D}_6$  at  $23^\circ\text{C}$ .

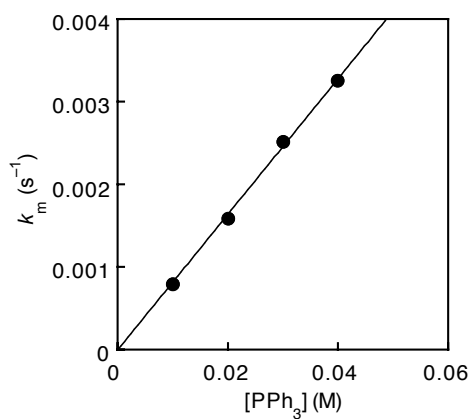

**Figure S7.** Dependence of  $k_m$  on  $[PPh_3]$  in the monomerization reaction of **D**.  $[ \{MeReO(mtp)\}_2 ] = 0.49$  mM and  $[MeS(O)Ph] = 9.9$  mM in  $C_6D_6$  at 23 °C.

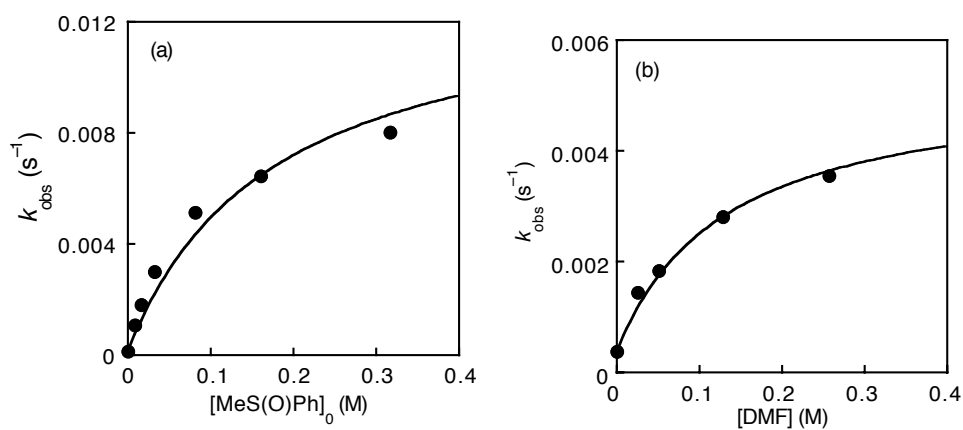

**Figure S8.** Dependence of  $k_{obs}$  for monomerization of **D** by  $PPh_3$  in the presence of (a)  $[MeS(O)Ph]$  and (b)  $[DMF]$ . (a)  $[D] = 0.4$  mM and  $[PPh_3] = 10.8$  mM, (b)  $[D] = 0.2$  mM and  $[PPh_3] = 17.3$  mM.

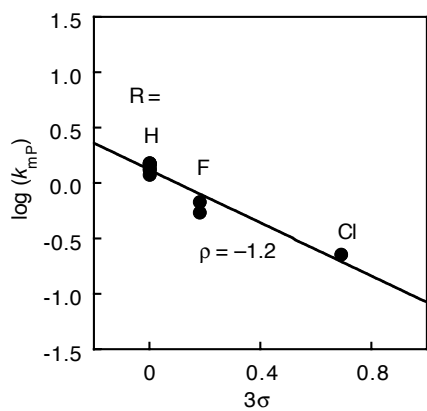

**Figure S9.** Hammett plot for the monomerization rate constant,  $k_{mp}$  for  $P(C_6H_4-4-R)_3$  in  $C_6D_6$  at 23 °C.
